# Supplementary material
Source: publisher site journal article supplement (http://static.cambridge.org/content/id/urn:cambridge.org:id:article:S1751731119000946/resource/name/S1751731119000946supp001.docx)
Supplement: Supplementary file 1 [file S1751731119000946supp001.docx]

Supplementary Material S1: “Would it sell more pork?” Pig farmers’ perceptions of Real Welfare, the welfare outcome component of their farm assurance scheme

J. Hockenhull, D.C.J. Main and S. Mullan

*animal* journal

Welfare Outcome Assessment (WOA) Question Schedule

## About your farm

Pig flow – all in all out? ‘Bed and breakfast’ (contract rearer)

How many pigs do you have? (Finishers, but also sows/young) Define ages and weights.

How many over 50kg? (Now, and in general)

How many 30-50kg?

How does the farm work? (pen size, group size, substrate, flooring- slats/solid)

Are you a contract rearer? Farm owner? Part of a group? Who do you supply?

How long have you been pig farming?

## Schemes/inspection

Which Farm Assurance scheme(s) are you in? Red Tractor (RT)/RSPCA Assured/Soil Association (SA)/other

When was your last scheme annual inspection?

What did that involve?

When was your last quarterly vet visit?

What did your vet do on that visit? (Who are they?)

## Welfare Outcome assessment

For Real Welfare (Red Tractor) assessments:

Did you have a welfare assessment of your pigs? (If not, have you ever had one?)

What did they do for that?

Did your vet discuss the assessment with you?

Did you receive a written report? (Take photo?)

What did it cover? (measures- tail lesions, body marks, enrichment use, lame pigs, hospital pigs)

How did you use the report?

Did anything surprise you?

Did the vet give you any advice?

Have you talked about your results with anyone else?

IF REPORT WAS GOOD:

Have you ever had a problem raised?

IF YES:

How did you go about tackling the problem? (Vet advice, other sources?)

Did you make any changes? (or planning to make?)

Do you have pigs with docked tails? (Have you ever had?)

Why are they docked?

Do you use bedding? If so what?

Do you use enrichment or toys? If so what?

Do you receive any other reports about health/welfare (abattoir or another scheme)?

How useful are they?

Do you think the welfare of the pigs on your farm has changed over the last few years? (How, why- Real Welfare?)

## Implications of Real Welfare

What impact do you think Real Welfare has … ?

For your/ individual farm

For British pigs

If there was any part of the Real Welfare process you could change what would it be? (How)

## If RSPCA Assured/SA

Did your RSPCA Assured/SA inspector do a welfare assessment of your pigs?

How did that work? (process and feedback)

How did that compare to your Real welfare assessment (Process and results)

Anything else you would like to say?

Thank you.
